# Supplementary material
Source: MDPI journal article supplement (https://www.mdpi.com/2571-6255/5/2/41)
Supplement: s1 [file s1]

## 6. Supplementary Material

We modeled the drivers of burn severity within five Labor Day 2020 wildfire perimeters along a latitudinal gradient in the western Cascades of Oregon state; from north to south, these included the Riverside (55,901 ha, 45.10 N), Beachie Creek (78,364 ha, 44.84 N), Lionshead (82,802 ha, 44.76, N), Holiday Farm (70,171 ha, 44.15 N), and Archie Creek (53,241 ha, 43.36 N) fires. During this period, an extreme pressure gradient fueled strong easterly winds, atypical for this time of the year, which descended over the Cascade crest as adiabatic effects warmed and dried the air and maintained fuel moisture at extreme lows with no nighttime recovery. Onshore air flow returned on Sept 10, and while fuel moisture remained low, winds subsided, and relative humidity recovered at night. Combined with an inverted temperature column that formed at low elevation, fire activity in the post-wind period was constrained to higher elevations. The first of the fall rains began on September 17th. The fires burned 334,500 hectares in total, with the vast majority (80%) of fire growth occurring during the ca. 72 hr period between September 7th and 9th. Likewise, the proportion of the fire area that burned at high severity during the wind event was approximately three times that which occurred in the period that followed (65% vs. 26%).

1 Riverside

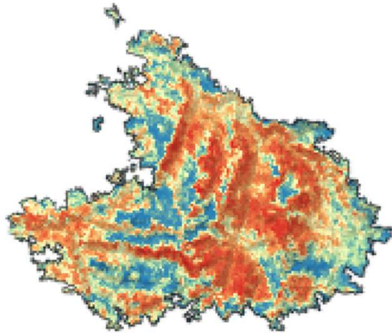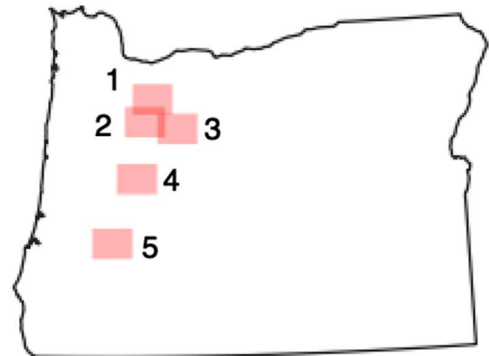

2 Beachie Creek

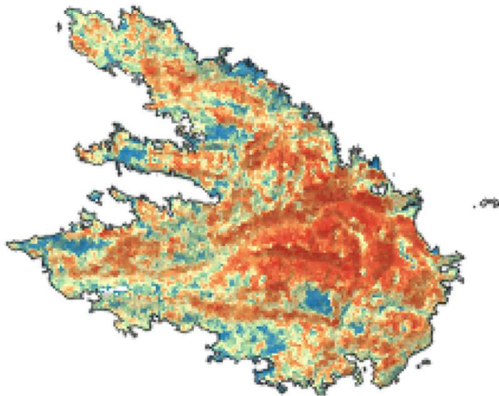

3 Lionshead

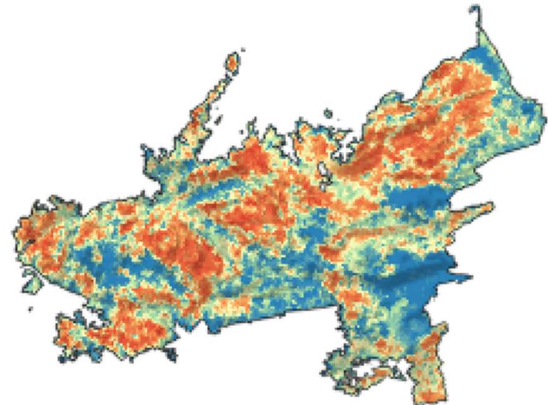

4 Holiday Farm

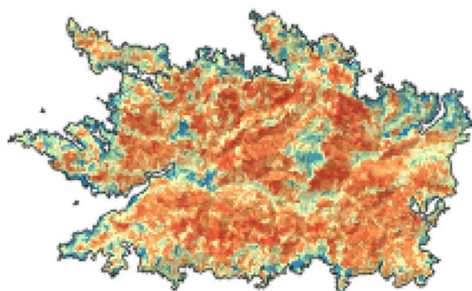

5 Archie Creek

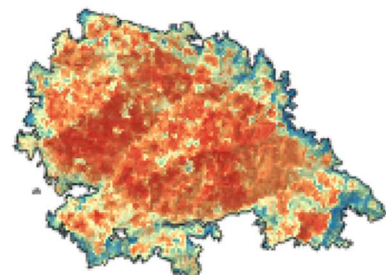

**Figure S1.** Geographic locations, perimeters, and continuous burn severity estimates (dNBR; following histogram distribution from Figure S2) of the five wildfires analyzed in this study within the western Cascades of Oregon state.

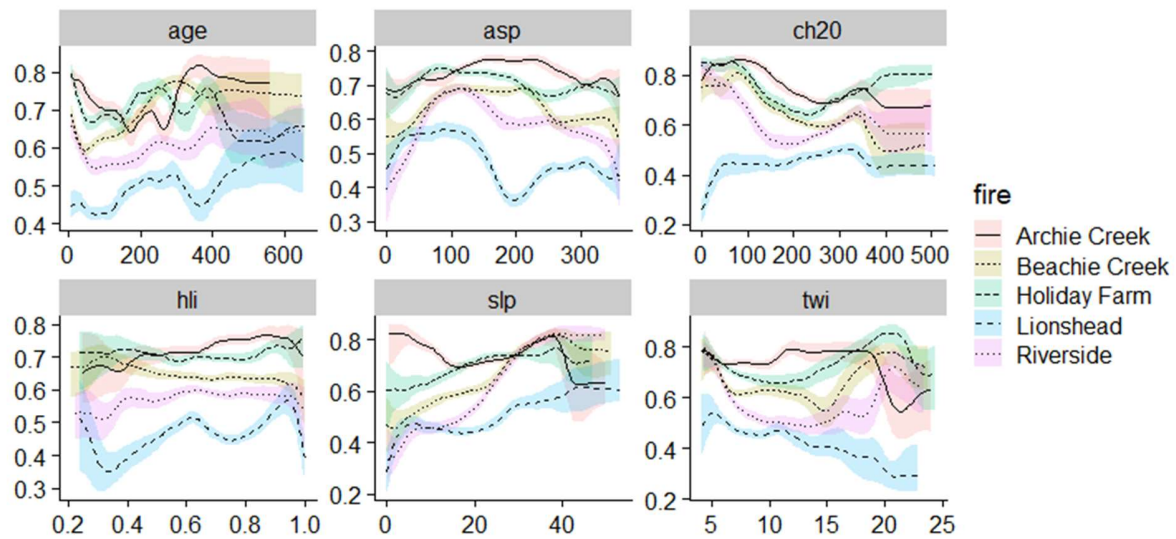

**Figure S2.** Partial dependence plots of most important variables by individual event (both periods combined).

**Table S1.** Percent of fire excluded from the analysis. Fires are listed latitudinally from S to N.

| Row Labels    | Hectares burned | Included (<1250m) | Excluded (<1250m) |
|---------------|-----------------|-------------------|-------------------|
| Archie Creek  | 53,125          | 97.8% (97.1%)     | 2.2% (2.9%)       |
| Holiday Farm  | 69,594          | 96.9% (92.3%)     | 3.1% (7.7%)       |
| Beachie Creek | 77,474          | 95.6% (89.6%)     | 4.4% (11.1%)      |
| Lionshead     | 79,591          | 51.6% (32.6%)     | 48.4% (67.5%)     |
| Riverside     | 54,645          | 94.9% (88.9%)     | 5.1% (11.1%)      |
| Combined      | 334,429         | 87.0% (77.3%)     | 13.0% (22.7%)     |

**Table S2.** AUC and deviance explained for combined and separated samples and also filtered by both period and/or elevation below 1250m. The combined stratified sample was drawn equally from both periods despite substantial differences in area burned.

| Sample              | Training |         | Test |         |
|---------------------|----------|---------|------|---------|
|                     | AUC      | dev exp | AUC  | dev exp |
| Combined random     | 0.91     | 0.40    | 0.77 | 0.17    |
| Combined stratified | 0.97     | 0.60    | 0.83 | 0.24    |
| Period 1            | 0.88     | 0.33    | 0.75 | 0.15    |
| Period 2            | 0.99     | 0.76    | 0.85 | 0.27    |
| Stratified (<1250m) | 0.97     | 0.61    | 0.84 | 0.26    |
| Period 1 (<1250m)   | 0.90     | 0.37    | 0.76 | 0.16    |
| Period 2 (<1250m)   | 0.99     | 0.80    | 0.87 | 0.29    |

**Table S3.** Area burned (ha) by fire (w/o excluded area). The totals presented here do not include areas burned during the Sept fires that did not meet the criteria detailed in the methods. Fires are listed latitudinally from S to N.

| Row Labels   | Hectares | Wind  | Post Wind |
|--------------|----------|-------|-----------|
| Archie Creek | 52,104   | 87.3% | 12.7%     |
| Holiday Farm | 68,002   | 89.3% | 10.7%     |

|               |         |       |       |
|---------------|---------|-------|-------|
| Beachie Creek | 74,908  | 97.6% | 2.4%  |
| Lionshead     | 42,767  | 84.5% | 15.5% |
| Riverside     | 53,066  | 88.2% | 11.8% |
| Combined      | 290,847 | 90.2% | 9.8%  |

**Table S4.** Percent high severity by burn period (w/o excluded area). The totals presented here do not include areas burned during the Sept fires that did not meet the criteria detailed in the methods. Fires are listed latitudinally from S to N.

| Row Labels    | Combined | Wind  | Post Wind |
|---------------|----------|-------|-----------|
| Archie Creek  | 72.1%    | 79.5% | 21.0%     |
| Holiday Farm  | 68.5%    | 72.9% | 32.0%     |
| Beachie Creek | 62.0%    | 63.2% | 16.5%     |
| Lionshead     | 47.5%    | 49.4% | 36.9%     |
| Riverside     | 56.4%    | 60.7% | 24.3%     |
| Combined      | 62.2%    | 65.9% | 27.9%     |

**Table S5.** Variable importance within boosted regression trees for 12 independent variables, as shown in Figure 2 for the combined stratified sample (st), period 1 (p1), period (2), repeated using the 1250m filter.

| rank | var                        | st  | p1  | p2  | st_1250 | p1_1250 | p2_1250 |
|------|----------------------------|-----|-----|-----|---------|---------|---------|
| 1    | Canopy height (ch)         | 14% | 13% | 22% | 16%     | 13%     | 28%     |
| 2    | Elevation (elv)            | 12% | 12% | 17% | 10%     | 12%     | 12%     |
| 3    | Period (period)            | 11% | -   | -   | 12%     | -       | -       |
| 4    | Slope (slp)                | 10% | 13% | 8%  | 11%     | 13%     | 8%      |
| 5    | Aspect (asp)               | 8%  | 9%  | 8%  | 7%      | 9%      | 7%      |
| 6    | Topographic wetness (twi)  | 8%  | 9%  | 7%  | 7%      | 9%      | 6%      |
| 7    | Canopy cover (cc)          | 8%  | 9%  | 8%  | 8%      | 9%      | 9%      |
| 8    | Topographic position (tpi) | 7%  | 8%  | 6%  | 7%      | 8%      | 5%      |
| 9    | Fire (fire)                | 7%  | 9%  | 5%  | 7%      | 9%      | 5%      |
| 10   | Heat loading (hli)         | 7%  | 8%  | 9%  | 7%      | 8%      | 8%      |
| 11   | Stand age (age)            | 6%  | 7%  | 6%  | 6%      | 7%      | 6%      |
| 12   | Ownership (own)            | 2%  | 3%  | 5%  | 3%      | 3%      | 5%      |
|      | Topographic variables      | 52% | 59% | 55% | 49%     | 59%     | 46%     |
|      | Veg structure variable     | 28% | 29% | 36% | 30%     | 29%     | 43%     |

**Table S6.** Variable interactions among for combined stratified sample and separated by period. Only the top 10 interactions are shown (out of the 55 potential pairings). See methods and supplementary scripts for how interactions were calculated and Table S4 for variable abbreviations.

| combined (stratified) |             |             | period1   |             | period2   |             |
|-----------------------|-------------|-------------|-----------|-------------|-----------|-------------|
| rank                  | var_combo   | interaction | var_combo | interaction | var_combo | interaction |
| 1                     | period:own  | 63.13       | ch20:cc20 | 142.36      | fire:elv  | 79.82       |
| 2                     | ch20:cc20   | 50.85       | fire:slp  | 76.09       | ch20:cc20 | 76.53       |
| 3                     | fire:elv    | 41.5        | ch20:slp  | 50.57       | ch20:elv  | 41.32       |
| 4                     | period:slp  | 36.95       | fire:elv  | 49.37       | slp:elv   | 38.91       |
| 5                     | period:elv  | 33.6        | fire:own  | 47.77       | fire:cc20 | 29.36       |
| 6                     | period:fire | 27.85       | fire:ch20 | 32.73       | own:ch20  | 23.81       |
| 7                     | ch20:elv    | 21.56       | own:elv   | 31.65       | own:slp   | 23.6        |

|    |             |       |          |       |           |       |
|----|-------------|-------|----------|-------|-----------|-------|
| 8  | period:ch20 | 13.65 | fire:asp | 17.68 | own:elv   | 22.07 |
| 9  | own:ch20    | 12.6  | ch20:age | 15.3  | fire:own  | 22    |
| 10 | period:asp  | 10.49 | slp:elv  | 13.61 | fire:ch20 | 17.17 |

**Table S7.** Area burned (ha) by ownership (w/o excluded area; 1 = BLM, 2 = ST ). The totals presented here do not include areas burned during the Sept fires that did not meet the criteria detailed in the methods. Fires are listed latitudinally from S to N.

| Row Labels    | USFS  | Private | BLM               | State |
|---------------|-------|---------|-------------------|-------|
| Archie Creek  | 19.9% | 48.6%   | 31.5%             | 0%    |
| Holiday Farm  | 18.5% | 70.1%   | 10.9%             | 0.5%  |
| Beachie Creek | 27.0% | 39.7%   | 20.8%             | 12.4% |
| Lionshead     | 93.3% | 6.3%    | 0.0% <sup>2</sup> | 0.5%  |
| Riverside     | 61.5% | 30.1%   | 8.4% <sup>1</sup> | 0%    |
| Combined      | 39.8% | 41.7%   | 18.5%             | 100%  |

**Table S8.** Percent of high severity (i.e., >75% tree mortality) by ownership. Fires are listed latitudinally from S to N.

| Row Labels    | USFS | Private | Other |
|---------------|------|---------|-------|
| Archie Creek  | 47%  | 55%     | 47%   |
| Holiday Farm  | 42%  | 55%     | 45%   |
| Beachie Creek | 60%  | 38%     | 27%   |
| Lionshead     | 43%  | 21%     | 43%   |
| Riverside     | 38%  | 43%     | 35%   |
| Grand Total   | 46%  | 42%     | 39%   |
